# Supplementary material for: Revisiting Early Jurassic Biscutaceae:Similiscutum giganteumsp. nov.
Source: Copernicus journal article supplement (doi:10.5194/jm-42-1-2023), 2023-03-03
Supplement: Supplementary file 1 [file jm-42-1-2023-supplement.zip]

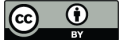

*Supplement of*

**Revisiting Early Jurassic Biscutaceae: *Similiscutum giganteum* sp. nov.**

**Samuel Mailliot et al.**

*Correspondence to:* Emanuela Mattioli ([emanuela.mattioli@univ-lyon1.fr](mailto:emanuela.mattioli@univ-lyon1.fr))

- [jm-42-1-2023-supplement-title-page.pdf](#)
- [Supplementary Tables.xlsx](#)

The copyright of individual parts of the supplement might differ from the article licence.
